# Supplementary material for: Microbial taxa and functional genes shift in degraded soil with bacterial wilt
Source: PubMed Central journal article supplement (PMC5209727; doi:10.1038/srep39911), 2017-01-04

# Microbial taxa and functional genes shift in degraded soil with bacterial wilt

**Running title: Microbial communities respond to soil degradation**

Hongchun Zhang<sup>1a</sup>, Rui Wang<sup>1a</sup>, Shu Chen<sup>1</sup>, Gaofu Qi<sup>1</sup>, Zhili He<sup>1,2</sup>, Xiuyun Zhao<sup>1\*</sup>

<sup>1</sup>College of Life Science and Technology, Huazhong Agricultural University, Wuhan  
430070, China;

<sup>2</sup>Institute for Environmental Genomics and Department of Microbiology and Plant  
Biology, University of Oklahoma, Norman, OK 73019, USA.

<sup>a</sup> Same contribution to this study.

\*Correspondence author, E-mail: xiuyunzh@mail.hzau.edu.cn; Tel:  
+86-15387157410.

**Table S1 Summary for 16S rRNA pyrosequencing data**

| <b>Samples</b> | <b>Number of reads</b> | <b>Number of OTUs</b> | <b>Chao 1</b> | <b>Shannon's index</b> |
|----------------|------------------------|-----------------------|---------------|------------------------|
| D01            | 28837                  | 6379                  | 14135         | 7.54                   |
| D02            | 25414                  | 5948                  | 14530         | 7.29                   |
| D03            | 25119                  | 5004                  | 10076         | 7.15                   |
| D04            | 28034                  | 6364                  | 12940         | 7.71                   |
| D05            | 28034                  | 6881                  | 14886         | 7.76                   |
| H01            | 44458                  | 10566                 | 53235         | 8.20                   |
| H02            | 42545                  | 7709                  | 18288         | 7.96                   |
| H03            | 38881                  | 8233                  | 22691         | 7.99                   |
| H04            | 25645                  | 9579                  | 37568         | 8.13                   |
| H05            | 35772                  | 6888                  | 14602         | 7.82                   |

**Table S2 Summary for 18S rRNA pyrosequencing data**

| <b>Sample</b> | <b>Number of reads</b> | <b>Number of OTUs</b> | <b>Chao 1</b> | <b>Shannon's index</b> |
|---------------|------------------------|-----------------------|---------------|------------------------|
| H01           | 24900                  | 1984                  | 7336          | 4.29                   |
| H02           | 43031                  | 2131                  | 9760          | 4.39                   |
| H03           | 24976                  | 1458                  | 6643          | 3.65                   |
| H04           | 25889                  | 2216                  | 10302         | 4.34                   |
| H05           | 43600                  | 1867                  | 8443          | 3.99                   |
| D01           | 43685                  | 1524                  | 6140          | 3.66                   |
| D02           | 45838                  | 1136                  | 6314          | 3.77                   |
| D03           | 28505                  | 1729                  | 8027          | 3.79                   |
| D04           | 46567                  | 1348                  | 6633          | 3.63                   |
| D05           | 38220                  | 1776                  | 8224          | 3.87                   |

Table S3 Pathogenic *Ralstonia* and *Pseudomonas* OTUs

| OTU designation | Nearest strain (% identity) <sup>a</sup>               | Abundance in Healthy soils <sup>b</sup> | Abundance in Degraded soils <sup>b</sup> |
|-----------------|--------------------------------------------------------|-----------------------------------------|------------------------------------------|
| 890             | <i>Ralstonia solanacearum</i> strain in4ss52 (99%)     | 6.6 ± 1.52 B                            | 15.6 ± 2.66 A                            |
| 10283           | <i>Ralstonia solanacearum</i> strain in4ss52 (98%)     | 0.2 ± 0.45 b                            | 1.6 ± 0.89 a                             |
| 12313           | <i>Ralstonia solanacearum</i> strain 08BF31TG (99%)    | 0.4 ± 0.54 B                            | 2.2 ± 0.84 A                             |
| 1075            | <i>Pseudomonas corrugate</i> strain BS3649 (99%)       | 2.4 ± 0.54 B                            | 4.4 ± 0.89 A                             |
| 1197            | <i>Pseudomonas mediterranea</i> strain DSM 16733 (99%) | 2.2 ± 1.09 b                            | 4.2 ± 1.64 a                             |
| 4678            | <i>Pseudomonas aeruginosa</i> strain BOAKS 44E (99%)   | 0.8 ± 0.44 b                            | 2.4 ± 1.51 a                             |
| 11417           | <i>Pseudomonas corrugata</i> strain BS3649 (99%)       | 0.2 ± 0.44 B                            | 1.8 ± 0.83 A                             |
| 13587           | <i>Pseudomonas corrugata</i> strain BS3649 (98%)       | 0.2 ± 0.44 B                            | 1.2 ± 0.44 A                             |
| 14466           | <i>Pseudomonas corrugata</i> strain BS3649 (98%)       | 0 B                                     | 1.4 ± 0.54 A                             |
| 23851           | <i>Pseudomonas syringae</i> isolate 21 (97%)           | 0 B                                     | 1.8 ± 0.83 A                             |

<sup>a</sup> % identity values are from analyses using BLAST (NCBI) where coverage was at least 97%.

<sup>b</sup> The different lower-case letters and capital letters in same row indicated significant difference between healthy and degraded soils at  $P < 0.05$  and  $P < 0.01$ , respectively.

**Figure S1** Relative abundances of the dominant bacterial taxa in healthy and degraded soil samples at the phylum level. H1-5: healthy soils; D1-5: degraded soils.

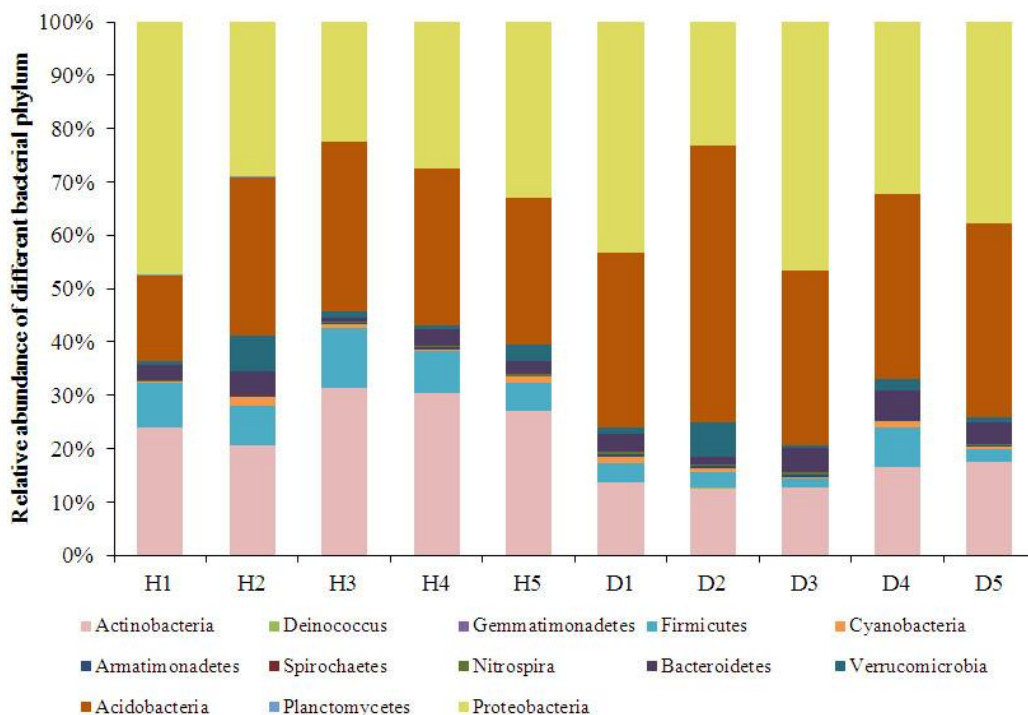

**Figure S2** Relative abundances of the dominant fungal taxa in healthy and degraded soil samples at the phylum level. H1-5: healthy soils; D1-5: degraded soils.

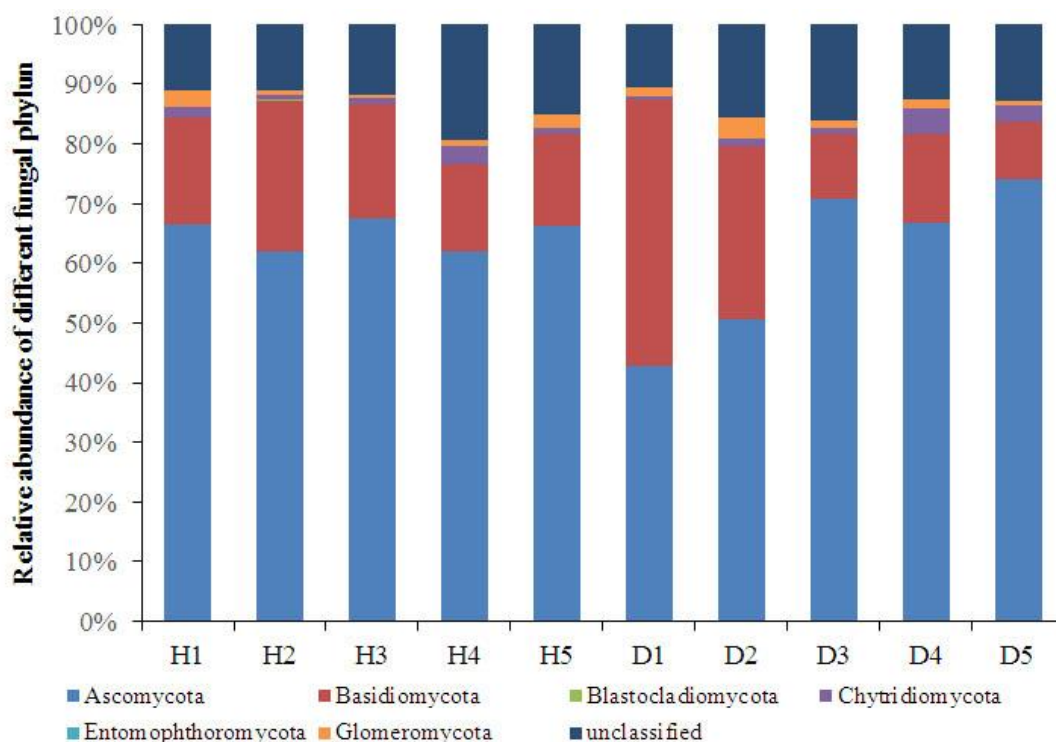

**Figure S3 Relative abundance of various functional groups detected in healthy and degraded soil samples. H1-5: healthy soils; D1-5: degraded soils.**

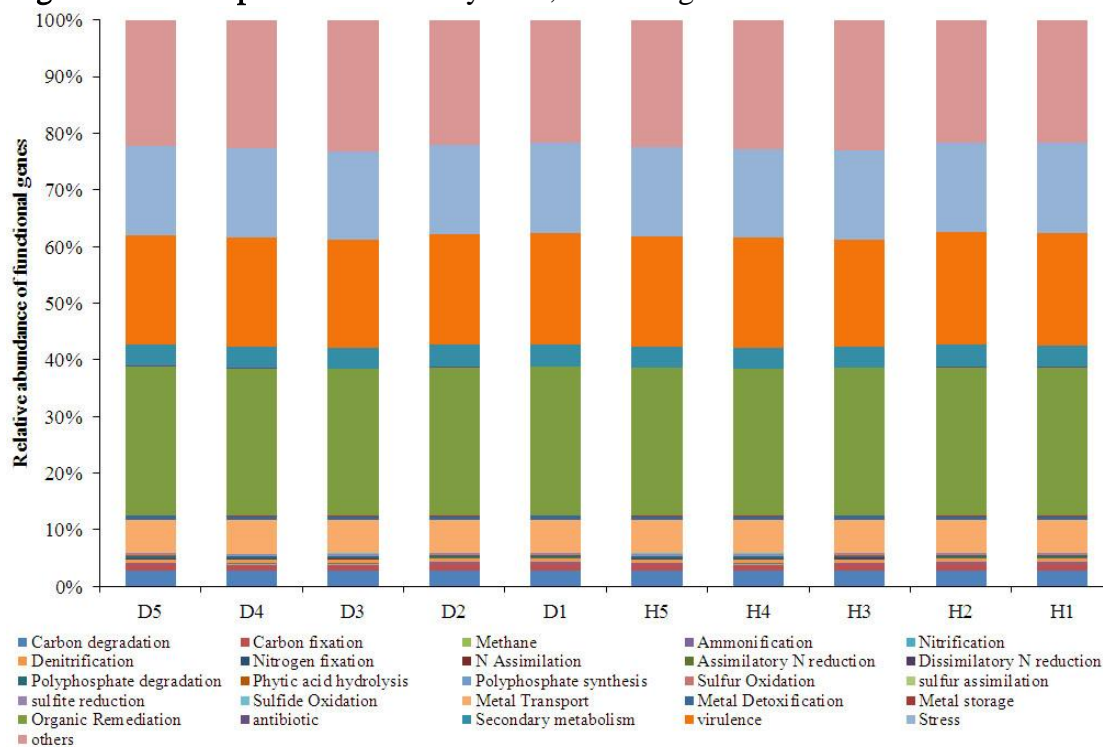

**Figure S4 Stress related genes.** The normalized signal intensity of functional genes involved in stress was compared between healthy and degraded soils. All data are presented as the mean  $\pm$  SE. \*  $P < 0.05$ .

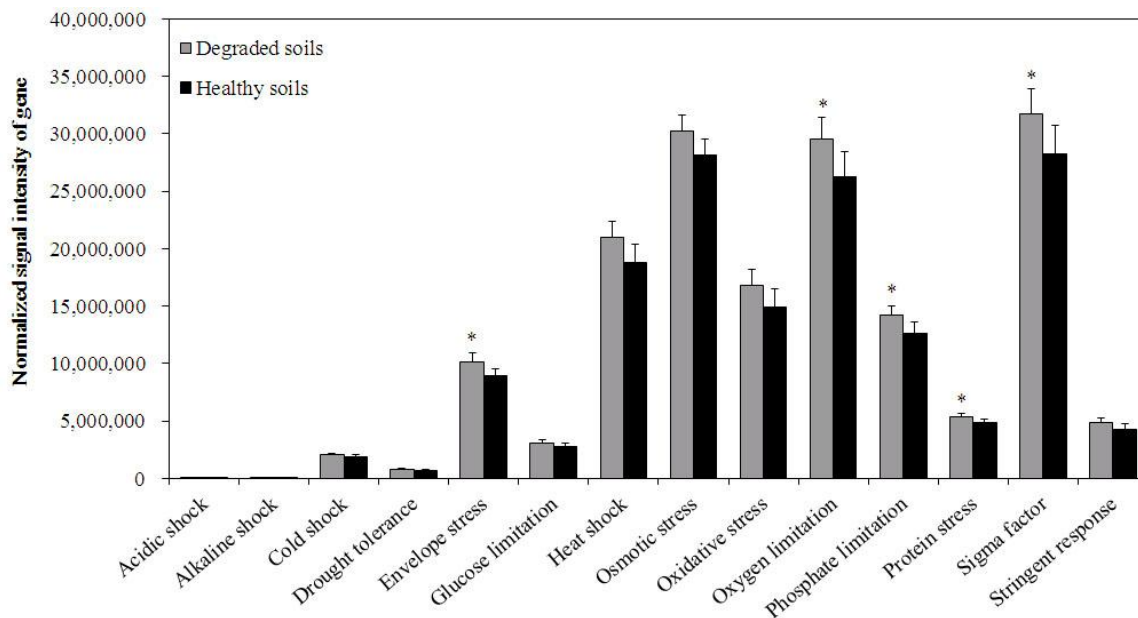

**Figure S5 Virulence related genes.** The normalized signal intensity of genes involved in virulence was compared between healthy and degraded soils. All data are presented as the mean  $\pm$  SE. \*\*  $P < 0.01$ , \*  $P < 0.05$ .

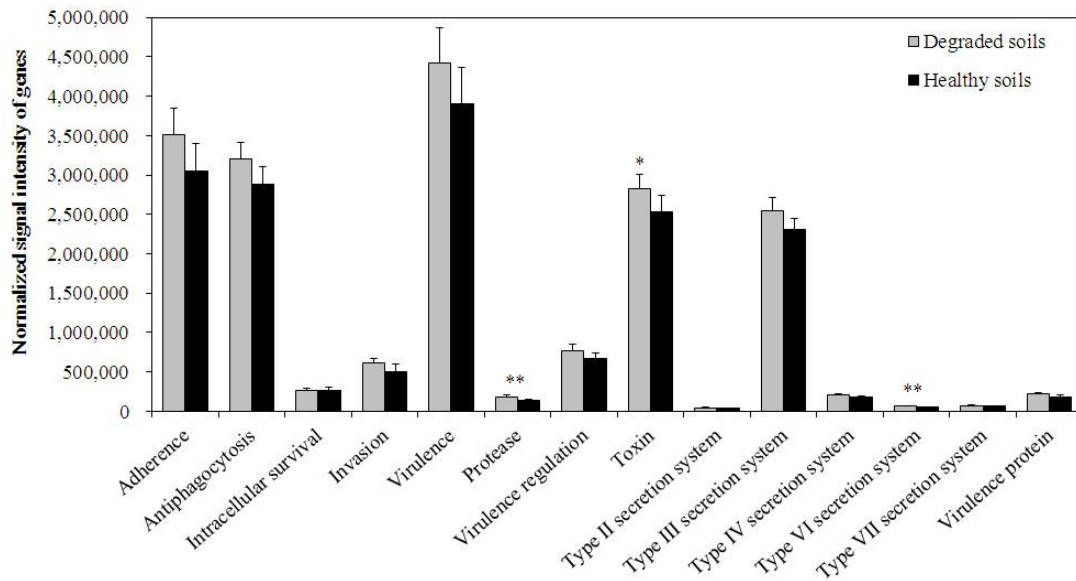

**Figure S6 Metal related genes.** The normalized signal intensity of metal resistance genes was compared between healthy and degraded soils. All data are presented as the mean  $\pm$  SE. \*\*  $P < 0.01$ , \*  $P < 0.05$ .

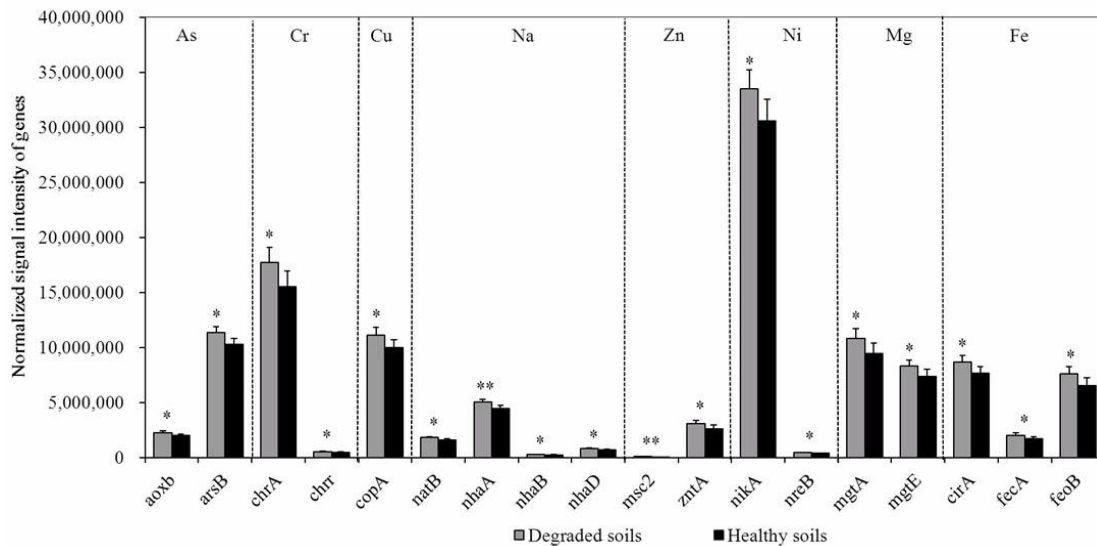

Supplement: srep39911-s1.pdf [file srep39911-s1.pdf]
